# Supplementary material for: The Cytokine, Chemokine, and Growth Factor Network of Prenatal Depression
Source: MDPI journal article supplement (doi:10.3390/brainsci13050727), 2023-04-26
Supplement: s1 [file s1]

# The Cytokine, Chemokine, and Growth Factor Network of Prenatal Depression

Michael Maes <sup>1,2,3,4,5,\*</sup>, Yoshiko Abe <sup>6,7</sup>, Wandee Sirichokchatchawan <sup>6,8</sup>, Junpen Suwimonterabutr <sup>9</sup>,  
Ussanee Sangkomkamhangd <sup>10</sup>, Abbas F. Almulla <sup>1,11</sup> and Sirina Satthapisit <sup>12</sup>

<sup>1</sup> Department of Psychiatry, Faculty of Medicine, Chulalongkorn University and King Chulalongkorn Memorial Hospital, the Thai Red Cross Society, Bangkok 10330, Thailand

<sup>2</sup> Kyung Hee University, 26 Kyungheeda-ro, Dongdaemun-gu, Seoul 02447, Republic of Korea

<sup>3</sup> Department of Psychiatry, Medical University of Plovdiv, 4002 Plovdiv, Bulgaria

<sup>4</sup> Research Institute, Medical University of Plovdiv, 4002 Plovdiv, Bulgaria

<sup>5</sup> IMPACT Strategic Research Center, Barwon Health, Geelong 3220, Australia

<sup>6</sup> College of Public Health Sciences (CPHS), Chulalongkorn University, Bangkok 10330, Thailand

<sup>7</sup> Department of Public Health, Dokkyo Medical University School of Medicine, Tochigi 321-0293, Japan

<sup>8</sup> Health and Social Sciences and Addiction Research Unit, Chulalongkorn University, Bangkok 10330, Thailand

<sup>9</sup> Department of Obstetrics, Gynaecology and Reproduction, Faculty of Veterinary Science, Chulalongkorn University, Bangkok 10330, Thailand

<sup>10</sup> Department of Obstetrics and Gynecology, Khon Kaen Hospital, Khon Kaen 40000, Thailand

<sup>11</sup> Medical Laboratory Technology Department, College of Medical Technology, The Islamic University, Najaf 54001, Iraq

<sup>12</sup> Department of Psychiatry, Khon Kaen Hospital, Khon Kaen 40000, Thailand

\* Correspondence: dr.michaelmaes@hotmail.com

**ESF, Table S1.** Cytokines, chemokines and growth factors measured in the current study

| <b>Protein abbreviations</b> | <b>Gene ID</b> | <b>Protein name</b>                                                              | <b>Cases with values &gt; lower limit OOR</b> |
|------------------------------|----------------|----------------------------------------------------------------------------------|-----------------------------------------------|
| IL-1 $\beta$                 | IL1B           | Interleukin-1 $\beta$                                                            | 33.3%                                         |
| IL-1RA                       | IL1RN          | Interleukin-1 receptor antagonist                                                | 87.5%                                         |
| IL-2                         | IL2            | Interleukin-2                                                                    | 8.8%                                          |
| IL-4                         | IL4            | Interleukin-4                                                                    | 69.9%                                         |
| IL-5                         | IL5            | Interleukin-5                                                                    | 0%                                            |
| IL-6                         | IL6            | Interleukin-6                                                                    | 42.3%                                         |
| IL-7                         | IL7            | Interleukin-7                                                                    | 28.7%                                         |
| CXCL8 / IL-8                 | CXCL8          | C-X-C motif chemokine ligand 8                                                   | 89.8%                                         |
| IL-9                         | IL9            | Interleukin-9                                                                    | 99.5%                                         |
| IL-10                        | IL10           | Interleukin-10                                                                   | 19.4%                                         |
| IL-12p70                     | IL12           | Interleukin-12                                                                   | 56.9%                                         |
| IL-13                        | IL13           | Interleukin-13                                                                   | 65.7%                                         |
| IL-15                        | IL15           | Interleukin-15                                                                   | 42.1%                                         |
| IL-17                        | IL17           | Interleukin-17                                                                   | 40.7%                                         |
| CCL11                        | CCL11          | Eotaxin                                                                          | 99.5%                                         |
| FGF2                         | FGF2           | Fibroblast growth factor 2, Basic fibroblast growth factor                       | 95.8%                                         |
| G-CSF                        | CSF3           | Granulocyte Colony Stimulating Factor, Colony Stimulating Factor 3 (Granulocyte) | 96.3%                                         |
| GM-CSF                       | CSF2           | Granulocyte-macrophage colony-stimulating factor, Colony-stimulating factor 2    | 63.0%                                         |
| IFN- $\gamma$                | IFNG           | Interferon- $\gamma$                                                             | 38.0%                                         |
| CXCL10 /IP-10                | CXCL10         | C-X-C motif chemokine ligand 8, Interferon gamma-induced protein 10              | 100%                                          |
| CCL2 / MCP1                  | CCL2           | C-C Motif Chemokine Ligand 2                                                     | 99.5%                                         |

|                       |       |                                                                                                            |       |
|-----------------------|-------|------------------------------------------------------------------------------------------------------------|-------|
| CCL3 / MIP-1 $\alpha$ | CCL3  | Macrophage inflammatory protein-1 alpha, C-C Motif Chemokine Ligand 3                                      | 97.0% |
| PDGF                  | PDGFB | Platelet Derived Growth Factor Subunit B                                                                   | 99.5% |
| CCL4 / MIP-1 $\beta$  | CCL4  | C-C Motif Chemokine Ligand 4, Macrophage Inflammatory Protein 1-Beta, Lymphocyte Activation Gene 1 Protein | 99.5% |
| CCL5 /RANTES          | CCL5  | C-C Motif Chemokine Ligand 5, Regulated Upon Activation, Normally T-Expressed, And Presumably Secreted     | 30.1% |
| TNF- $\alpha$         | TNF   | Tumor Necrosis Factor-Alpha                                                                                | 99.1% |
| VEGF                  | VEGFA | Vascular Endothelial Growth Factor                                                                         | 21.3% |

**ESF, Table S2.** Computation of the immune profile composite scores assessed in this study

| <b>Immune Profile</b> | <b>Members</b>                                                                                                                 |
|-----------------------|--------------------------------------------------------------------------------------------------------------------------------|
| <b>M1 macrophage</b>  | IL-1 $\beta$ , sIL-1RA, IL-6, TNF- $\alpha$ , CXCL8, CCL3                                                                      |
| <b>T helper-1</b>     | IL-2, IFN- $\gamma$ , IL-12                                                                                                    |
| <b>T helper-2</b>     | IL-4, IL-5, IL-9, IL-13                                                                                                        |
| <b>T helper-17</b>    | IL-6, IL-17                                                                                                                    |
| <b>IRS</b>            | IL-1 $\beta$ , IL-6, TNF- $\alpha$ , CXCL8, CCL3, IL-2, IFN- $\gamma$ , IL-12, IL-17, IL-15, G-CSF, GM-CSF, CXCL10, CCL5, CCL2 |
| <b>CIRS</b>           | IL-4, IL-10, sIL-1RA                                                                                                           |
| <b>Growth factors</b> | FGF, PDGF, VEGF                                                                                                                |
| <b>Chemokines</b>     | CXCL8, CXCL10, CCL2, CCL3, CCL4, CCL5, CCL11                                                                                   |
| <b>T cell growth</b>  | IL4, IL9, IL12, GM-CSF, IL-15                                                                                                  |
| <b>IRS/CIRS</b>       | (All IRS) / (All CIRS)                                                                                                         |

IRS: immune-inflammatory response system; CIRS: compensatory immunoregulatory system

**ESF2, Table S3.** Results of univariate GLM analyses of the immune profiles and the two-step-cluster analysis-generated classes with age and BMI as covariates.

| Dependent Variable | Clusters  | Estimates          |            |                         |             |
|--------------------|-----------|--------------------|------------|-------------------------|-------------|
|                    |           | Mean               | Std. Error | 95% Confidence Interval |             |
|                    |           |                    |            | Lower Bound             | Upper Bound |
| M1                 | Cluster 1 | -.159 <sup>a</sup> | .110       | -.377                   | .059        |
|                    | Cluster 2 | .275 <sup>a</sup>  | .145       | -.012                   | .562        |
| Th1                | Cluster 1 | -.226 <sup>a</sup> | .106       | -.437                   | -.015       |
|                    | Cluster 2 | .390 <sup>a</sup>  | .140       | .114                    | .667        |
| Th2                | Cluster 1 | -.160 <sup>a</sup> | .113       | -.384                   | .064        |
|                    | Cluster 2 | .276 <sup>a</sup>  | .149       | -.019                   | .570        |
| Th17               | Cluster 1 | -.184 <sup>a</sup> | .110       | -.401                   | .033        |
|                    | Cluster 2 | .318 <sup>a</sup>  | .144       | .032                    | .603        |
| IRS                | Cluster 1 | -.216 <sup>a</sup> | .105       | -.424                   | -.008       |
|                    | Cluster 2 | .373 <sup>a</sup>  | .138       | .100                    | .646        |
| CIRS               | Cluster 1 | -.118 <sup>a</sup> | .110       | -.336                   | .100        |
|                    | Cluster 2 | .204 <sup>a</sup>  | .145       | -.082                   | .490        |
| GF                 | Cluster 1 | -.162 <sup>a</sup> | .108       | -.377                   | .052        |
|                    | Cluster 2 | .280 <sup>a</sup>  | .142       | -.001                   | .562        |
| Chemokines         | Cluster 1 | -.150 <sup>a</sup> | .107       | -.362                   | .062        |
|                    | Cluster 2 | .259 <sup>a</sup>  | .141       | -.020                   | .538        |
| TcellG             | Cluster 1 | -.224 <sup>a</sup> | .109       | -.439                   | -.009       |
|                    | Cluster 2 | .387 <sup>a</sup>  | .143       | .104                    | .670        |
| IRS/CIRS           | Cluster 1 | -.157 <sup>a</sup> | .113       | -.382                   | .067        |
|                    | Cluster 2 | .271 <sup>a</sup>  | .149       | -.024                   | .566        |

a. Covariates appearing in the model are evaluated at the following values: Age = 27.21, BMI = 23.320.

### Univariate Tests

| Dependent Variable |          | Sum of Squares | df  | Mean Square | F      | Sig.  |
|--------------------|----------|----------------|-----|-------------|--------|-------|
| M1                 | Contrast | 5.241          | 1   | 5.241       | 5.694  | .019  |
|                    | Error    | 106.772        | 116 | .920        |        |       |
| Th1                | Contrast | 10.561         | 1   | 10.561      | 12.297 | <.001 |
|                    | Error    | 99.625         | 116 | .859        |        |       |
| Th2                | Contrast | 5.269          | 1   | 5.269       | 5.422  | .022  |
|                    | Error    | 112.731        | 116 | .972        |        |       |
| Th17               | Contrast | 6.989          | 1   | 6.989       | 7.652  | .007  |
|                    | Error    | 105.948        | 116 | .913        |        |       |
| IRS                | Contrast | 9.637          | 1   | 9.637       | 11.537 | <.001 |
|                    | Error    | 96.898         | 116 | .835        |        |       |
| CIRS               | Contrast | 2.882          | 1   | 2.882       | 3.138  | .079  |
|                    | Error    | 106.534        | 116 | .918        |        |       |
| GF                 | Contrast | 5.443          | 1   | 5.443       | 6.128  | .015  |
|                    | Error    | 103.022        | 116 | .888        |        |       |
| Chemokines         | Contrast | 4.647          | 1   | 4.647       | 5.324  | .023  |
|                    | Error    | 101.253        | 116 | .873        |        |       |
| TcellG             | Contrast | 10.368         | 1   | 10.368      | 11.590 | <.001 |
|                    | Error    | 103.769        | 116 | .895        |        |       |
| IRS/CIRS           | Contrast | 5.097          | 1   | 5.097       | 5.224  | .024  |

|       |         |     |      |  |  |
|-------|---------|-----|------|--|--|
| Error | 113.177 | 116 | .976 |  |  |
|-------|---------|-----|------|--|--|

The F tests the effect of Clusters. This test is based on the linearly independent pairwise comparisons among the estimated marginal means.

**ESF, Table S4.** Results of univariate GLM analyses of the single cytokines and growth factors and the two-step-cluster (TSC)-analysis-generated classes with age and BMI as covariates.

| Dependent Variable | Clusters  | Estimates          |            |                         |             |
|--------------------|-----------|--------------------|------------|-------------------------|-------------|
|                    |           | Mean               | Std. Error | 95% Confidence Interval |             |
|                    |           |                    |            | Lower Bound             | Upper Bound |
| sIL1RA             | Cluster 1 | -.087 <sup>a</sup> | .113       | -.310                   | .136        |
|                    | Cluster 2 | .150 <sup>a</sup>  | .148       | -.143                   | .443        |
| IL4                | Cluster 1 | -.168 <sup>a</sup> | .113       | -.392                   | .056        |
|                    | Cluster 2 | .290 <sup>a</sup>  | .149       | -.005                   | .585        |
| IL6                | Cluster 1 | -.143 <sup>a</sup> | .110       | -.360                   | .075        |
|                    | Cluster 2 | .247 <sup>a</sup>  | .144       | -.039                   | .532        |
| IL8                | Cluster 1 | -.150 <sup>a</sup> | .113       | -.374                   | .074        |
|                    | Cluster 2 | .259 <sup>a</sup>  | .149       | -.035                   | .554        |
| IL9                | Cluster 1 | -.055 <sup>a</sup> | .113       | -.279                   | .169        |
|                    | Cluster 2 | .095 <sup>a</sup>  | .149       | -.199                   | .390        |
| IL12               | Cluster 1 | -.182 <sup>a</sup> | .109       | -.398                   | .034        |
|                    | Cluster 2 | .314 <sup>a</sup>  | .143       | .030                    | .598        |
| IL13               | Cluster 1 | -.112 <sup>a</sup> | .115       | -.339                   | .115        |
|                    | Cluster 2 | .194 <sup>a</sup>  | .151       | -.105                   | .492        |
| IL15               | Cluster 1 | -.150 <sup>a</sup> | .110       | -.368                   | .067        |
|                    | Cluster 2 | .260 <sup>a</sup>  | .144       | -.026                   | .546        |
| IL17               | Cluster 1 | -.141 <sup>a</sup> | .114       | -.366                   | .084        |
|                    | Cluster 2 | .244 <sup>a</sup>  | .150       | -.053                   | .540        |
| TNFa               | Cluster 1 | -.094 <sup>a</sup> | .115       | -.321                   | .134        |
|                    | Cluster 2 | .162 <sup>a</sup>  | .151       | -.137                   | .461        |



|        |           |                    |      |       |      |
|--------|-----------|--------------------|------|-------|------|
| G_CSF  | Cluster 1 | -.109 <sup>a</sup> | .111 | -.328 | .110 |
|        | Cluster 2 | .188 <sup>a</sup>  | .145 | -.100 | .476 |
| GM_CSF | Cluster 1 | -.163 <sup>a</sup> | .110 | -.382 | .055 |
|        | Cluster 2 | .282 <sup>a</sup>  | .145 | -.006 | .570 |
| MIP1A  | Cluster 1 | -.092 <sup>a</sup> | .113 | -.316 | .132 |
|        | Cluster 2 | .159 <sup>a</sup>  | .149 | -.135 | .454 |
| MIP1b  | Cluster 1 | -.124 <sup>a</sup> | .110 | -.341 | .094 |
|        | Cluster 2 | .213 <sup>a</sup>  | .145 | -.073 | .500 |
| MCP1)  | Cluster 1 | -.092 <sup>a</sup> | .112 | -.314 | .130 |
|        | Cluster 2 | .159 <sup>a</sup>  | .147 | -.133 | .451 |
| CXCL10 | Cluster 1 | -.089 <sup>a</sup> | .112 | -.310 | .132 |
|        | Cluster 2 | .154 <sup>a</sup>  | .147 | -.137 | .445 |
| CCL11  | Cluster 1 | -.085 <sup>a</sup> | .115 | -.313 | .144 |
|        | Cluster 2 | .146 <sup>a</sup>  | .151 | -.154 | .446 |
| FGF    | Cluster 1 | -.091 <sup>a</sup> | .114 | -.317 | .135 |
|        | Cluster 2 | .157 <sup>a</sup>  | .150 | -.140 | .454 |
| PDGF   | Cluster 1 | -.062 <sup>a</sup> | .110 | -.280 | .156 |
|        | Cluster 2 | .107 <sup>a</sup>  | .145 | -.179 | .394 |

a. Covariates appearing in the model are evaluated at the following values: Age = 27.21, BMI = 23.320.

### Univariate Tests

| Dependent Variable |          | Sum of Squares | df  | Mean Square | F     | Sig. |
|--------------------|----------|----------------|-----|-------------|-------|------|
| sIL1RA             | Contrast | 1.562          | 1   | 1.562       | 1.625 | .205 |
|                    | Error    | 111.561        | 116 | .962        |       |      |

|        |          |         |     |       |       |      |
|--------|----------|---------|-----|-------|-------|------|
| IL4    | Contrast | 5.831   | 1   | 5.831 | 5.980 | .016 |
|        | Error    | 113.099 | 116 | .975  |       |      |
| IL6    | Contrast | 4.209   | 1   | 4.209 | 4.606 | .034 |
|        | Error    | 105.988 | 116 | .914  |       |      |
| IL8    | Contrast | 4.656   | 1   | 4.656 | 4.798 | .030 |
|        | Error    | 112.585 | 116 | .971  |       |      |
| IL9    | Contrast | .631    | 1   | .631  | .649  | .422 |
|        | Error    | 112.635 | 116 | .971  |       |      |
| IL12   | Contrast | 6.834   | 1   | 6.834 | 7.581 | .007 |
|        | Error    | 104.575 | 116 | .902  |       |      |
| IL13   | Contrast | 2.594   | 1   | 2.594 | 2.598 | .110 |
|        | Error    | 115.847 | 116 | .999  |       |      |
| IL15   | Contrast | 4.678   | 1   | 4.678 | 5.121 | .025 |
|        | Error    | 105.968 | 116 | .914  |       |      |
| IL17   | Contrast | 4.112   | 1   | 4.112 | 4.184 | .043 |
|        | Error    | 114.004 | 116 | .983  |       |      |
| TNFa   | Contrast | 1.820   | 1   | 1.820 | 1.818 | .180 |
|        | Error    | 116.114 | 116 | 1.001 |       |      |
| G_CSF  | Contrast | 2.439   | 1   | 2.439 | 2.626 | .108 |
|        | Error    | 107.722 | 116 | .929  |       |      |
| GM_CSF | Contrast | 5.509   | 1   | 5.509 | 5.949 | .016 |
|        | Error    | 107.429 | 116 | .926  |       |      |
| MIP1A  | Contrast | 1.755   | 1   | 1.755 | 1.810 | .181 |
|        | Error    | 112.498 | 116 | .970  |       |      |
| MIP1b  | Contrast | 3.156   | 1   | 3.156 | 3.440 | .066 |
|        | Error    | 106.438 | 116 | .918  |       |      |

|        |          |         |     |       |       |      |
|--------|----------|---------|-----|-------|-------|------|
| MCP1)  | Contrast | 1.750   | 1   | 1.750 | 1.833 | .178 |
|        | Error    | 110.754 | 116 | .955  |       |      |
| CXCL10 | Contrast | 1.641   | 1   | 1.641 | 1.736 | .190 |
|        | Error    | 109.671 | 116 | .945  |       |      |
| CCL11  | Contrast | 1.476   | 1   | 1.476 | 1.466 | .228 |
|        | Error    | 116.742 | 116 | 1.006 |       |      |
| FGF    | Contrast | 1.708   | 1   | 1.708 | 1.734 | .190 |
|        | Error    | 114.252 | 116 | .985  |       |      |
| PDGF   | Contrast | .796    | 1   | .796  | .866  | .354 |
|        | Error    | 106.582 | 116 | .919  |       |      |

The F tests the effect of Clusters. This test is based on the linearly independent pairwise comparisons among the estimated marginal means.

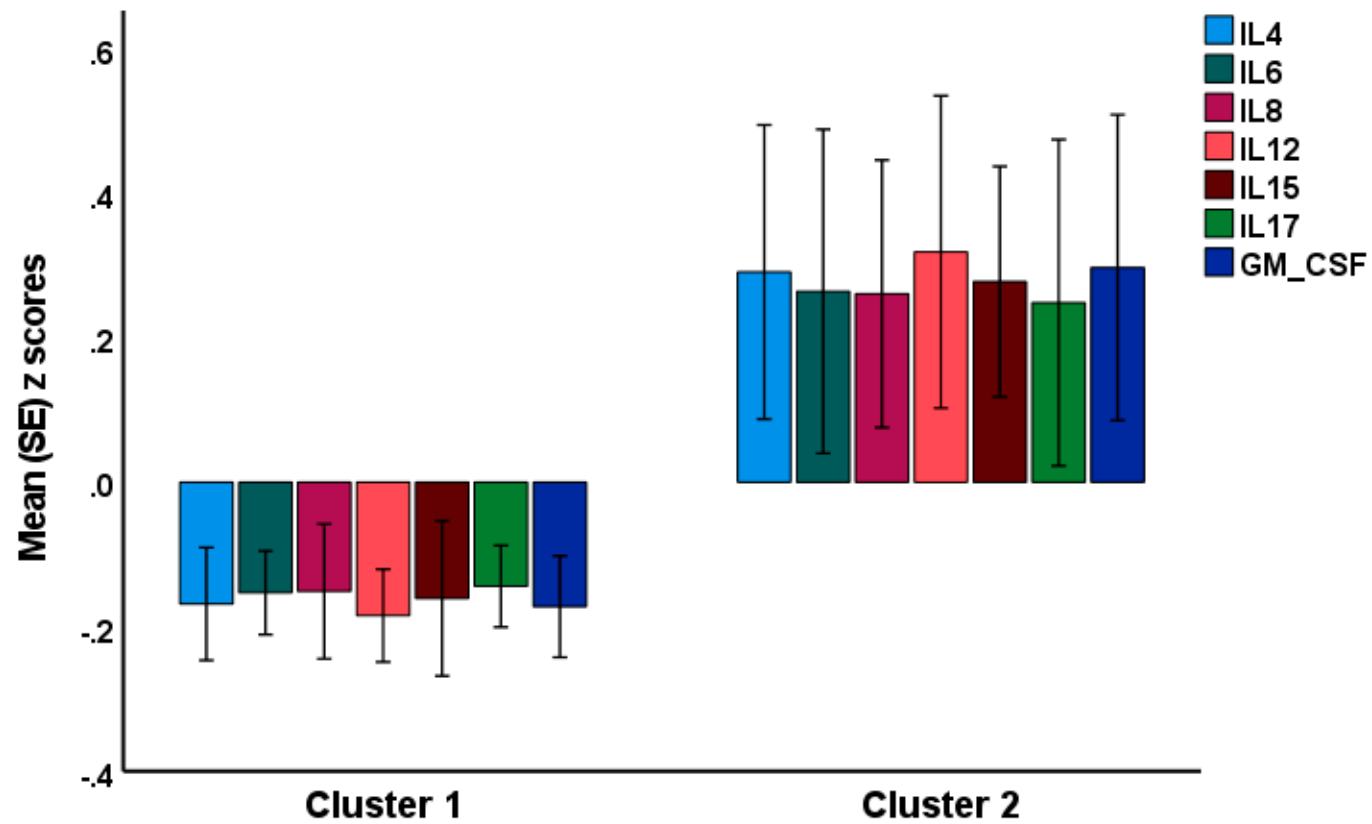

**ESF, Figure S1.** Results of cluster analysis performed on the Edinburgh Postnatal Depression Scale scores and immune profiles. IL: interleukin; GM-CSF: granulocyte-macrophage colony stimulating factor

**ESF, Table S5.** Results of general estimation equations (repeated measurements) analyses with the early and late Edinburgh Postnatal Depression Scale (EPDS) scores and immune profiles as dependent variables and time (early-late pregnancy phase), the cluster analysis-generated classes, and their interaction as explanatory variables.

| Variables              | Time, early    | Time, late     | Source       | Wald (df=1) | P      |
|------------------------|----------------|----------------|--------------|-------------|--------|
| EPDS Cluster 1         | 3.42 (0.29)    | 4.34 (0.36)    | Time         | 18.17       | <0.001 |
| EPDS Cluster 2         | 10.41 (0.67)   | 6.29 (0.69)    | Clusters     | 43.28       | <0.001 |
|                        |                |                | Interaction  | 44.93       | <0.001 |
| M1                     | -0.077 (0.901) | 0.205 (0.093)  | Time         | 6.48        | 0.011  |
| Th1 Cluster 1          | -0.295 (0.081) | 0.0237 (0.122) | Time         | 0.224       | 0.636  |
| Th1 Cluster 2          | 0.356 (0.198)  | 0.152 (0.164)  | Clusters     | 5.23        | 0.022  |
|                        |                |                | Interactions | 4.64        | 0.031  |
| Th-17 Cluster 1        | -0.310 (0.062) | 0.116 (0.108)  | Interaction  | 4.72        | 0.030  |
| Th-17 Cluster 2        | 0.255 (0.234)  | 0.155 (0.160)  |              |             |        |
| IRS Cluster 1          | -0.361 (0.069) | 0.136 (0.114)  | Clusters     | 4.04        | 0.044  |
| IRS Cluster 2          | 0.263 (0.208)  | 0.220 (0.181)  | Interaction  | 4.61        | 0.031  |
| CIRS                   | 0.216 (0.106)  | -0.200 (0.113) | Time         | 9.21        | 0.002  |
| GF Cluster 1           | -0.298 (0.093) | 0.252 (0.125)  | Interaction  | 5.80        | 0.016  |
| GF Cluster 2           | 0.139 (0.153)  | 0.041 (0.202)  |              |             |        |
| Tcell growth Cluster 1 | -0.291 (0.700) | 0.193 (0.125)  | Clusters     | 4.66        | 0.031  |
| Tcell growth Cluster 2 | 0.292 (0.184)  | 0.233 (0.206)  |              |             |        |
| IRS/CIRS               | -0.373 (0.093) | 0.534 (0.091)  | Time         | 69.90       | <0.001 |

Shown are the significant sources of variance. EPDS: Edinburgh Postnatal Depression Scale; M1: macrophage M1, Th: T helper, IRS: immune-inflammatory response system, CIRS: compensatory immunoregulatory system, GF: growth factors.
